# Supplementary material for: Determination of a localized surface plasmon resonance mode of Cu7S4 nanodisks by plasmon coupling
Source: Royal Society of Chemistry journal article supplement (doi:10.1039/c4fd00239c), 2015-01-01
Supplement: c4fd00239c1.pdf [file c4fd00239c1.pdf]

## Electronic Supplementary Information for

# Determination of a localized surface plasmon resonance mode of Cu<sub>7</sub>S<sub>4</sub> nanodisks by plasmon coupling

L. Chen,<sup>a</sup> M. Sakamoto,<sup>bc</sup> R. Sato<sup>b</sup> and T. Teranishi<sup>\*b</sup>

<sup>a</sup> Department of Chemistry, Graduate School of Science, Kyoto University, Gokasho, Uji, Kyoto 611-0011, Japan.

<sup>b</sup> Institute for Chemical Science, Kyoto University, Gokasho, Uji, Kyoto 611-0011, Japan.

<sup>c</sup> PRESTO, Japan Science and Technology Agency, Gokasho, Uji, Kyoto 611-0011, Japan.

\*E-mail: teranisi@scl.kyoto-u.ac.jp

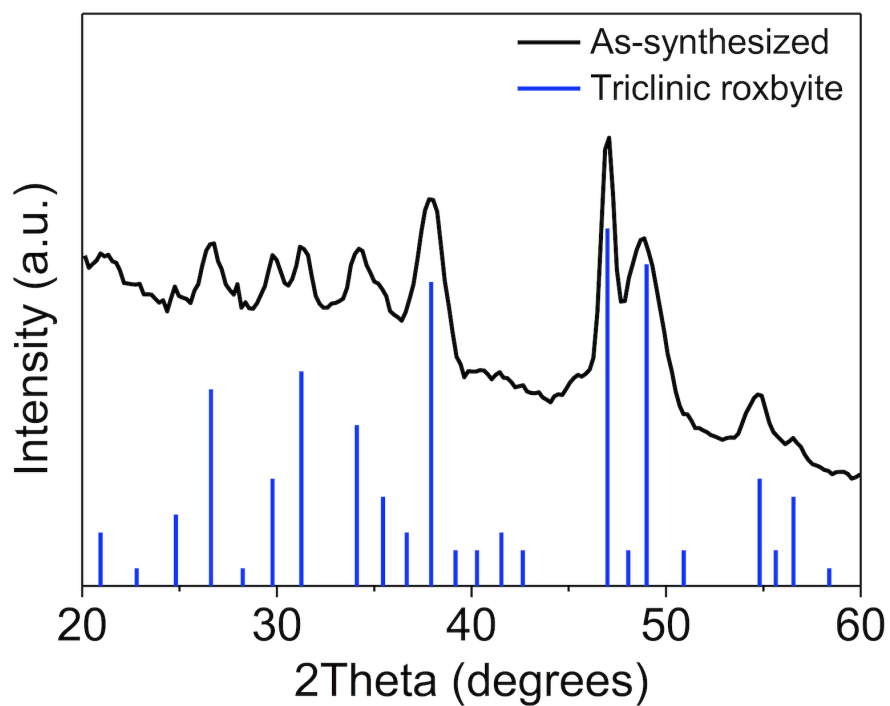

**Figure S1.** (a) XRD pattern of as-synthesized  $\text{Cu}_7\text{S}_4$  nanodisks with reference data of triclinic roxbyte  $\text{Cu}_{58}\text{S}_{32}$ .<sup>1</sup> The diffraction pattern of monoclinic  $\text{Cu}_7\text{S}_4$  phase identified in our previous report<sup>2</sup> is approximately the same as that of triclinic  $\text{Cu}_{58}\text{S}_{32}$  phase. Thus, the crystal structure of monoclinic  $\text{Cu}_7\text{S}_4$  is equal to triclinic  $\text{Cu}_{58}\text{S}_{32}$ .

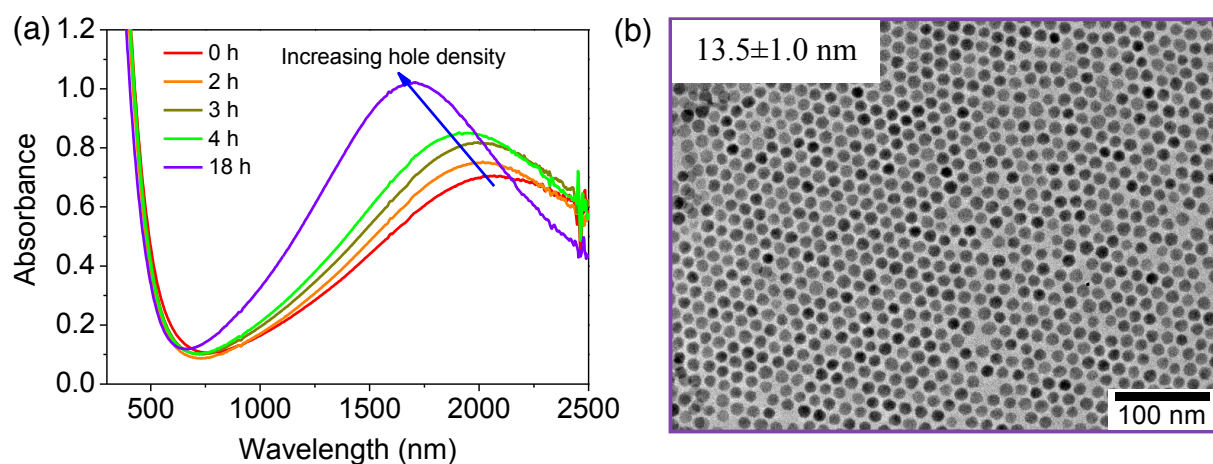

**Figure S2.** (a) Time evolution of UV-Vis-NIR absorption spectra of as-synthesized  $\text{Cu}_7\text{S}_4$  nanodisks in toluene during oxidation with air. (b) TEM image of oxidized (oxidation for 18 h)  $\text{Cu}_7\text{S}_4$  nanodisks oxidized for 18 h. The  $\text{Cu}_7\text{S}_4$  nanodisks stored in a glovebox were diluted and transferred to 5-mL flask, stabilized by a trace amount of OAm, taken out from a glovebox, and oxidized under air exposure without magnetic stirring. The slight decrease in size is due to the formation of Cu:OAm complexes.

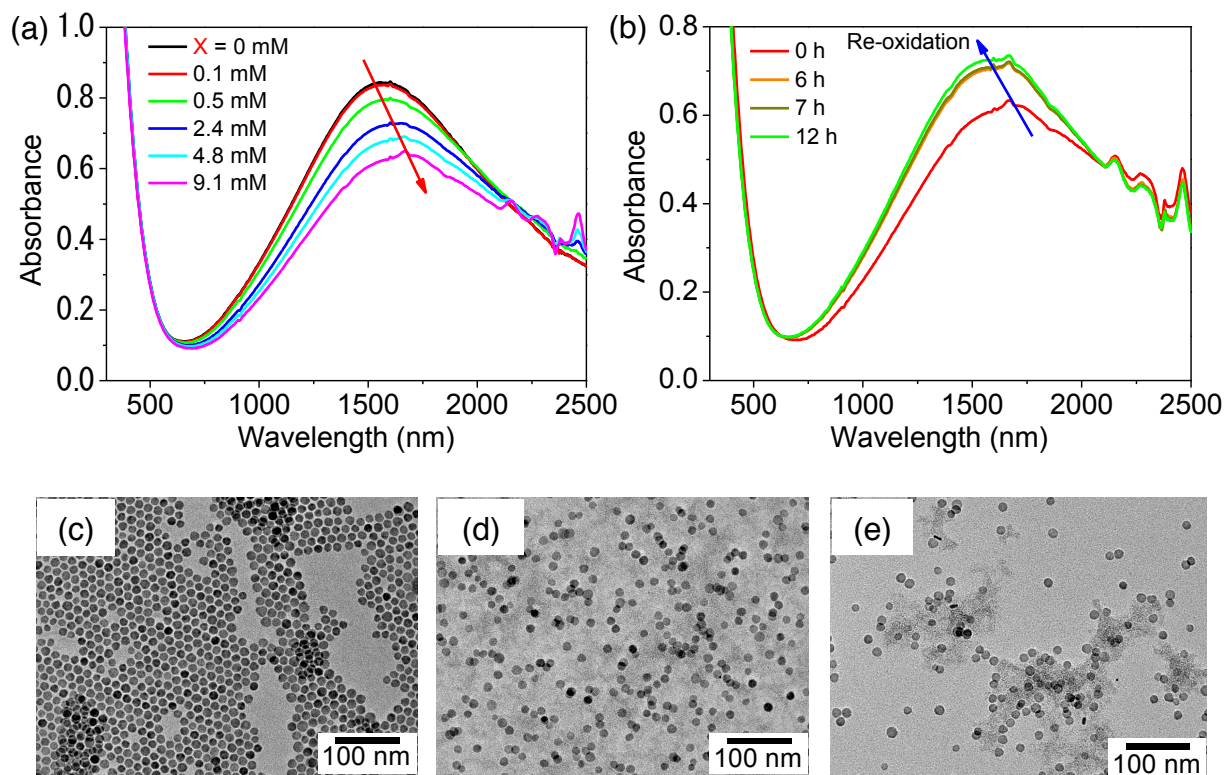

**Figure S3.** (a) UV-Vis-NIR absorption spectra of oxidized  $\text{Cu}_7\text{S}_4$  nanodisks in toluene (a) after reduction with various amounts of DIBAH for 5min and (b) after subsequent re-oxidation with air. TEM images of (c) air oxidized, (d) DIBAH reduced and (e) air re-oxidized  $\text{Cu}_7\text{S}_4$  nanodisks. The shape and size of  $\text{Cu}_7\text{S}_4$  nanodisks were conserved during the oxidation and reduction. Reduction with DIBAH: in a glovebox, 10 mL of oxidized nanodisks in toluene was transferred to a glass vial. Then, 0.1 M DIBAH toluene solution was stepwise added and shaken for 5 min. A total volume of 1.0 mL of DIBAH toluene solution was added. Re-oxidation with air: in a glovebox, the reduced  $\text{Cu}_7\text{S}_4$  nanodisks were transferred to 5-mL volumetric flask, taken out from a glovebox and oxidized under air exposure without magnetic stirring.

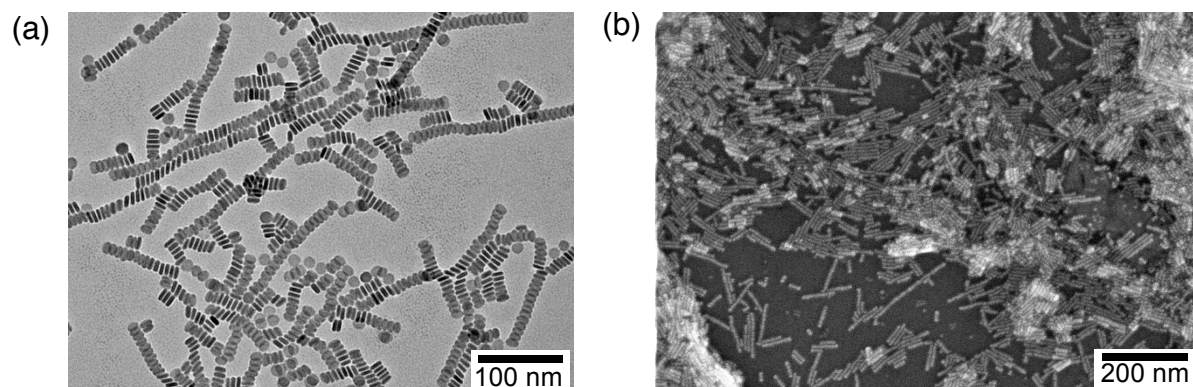

**Figure S4.** (a) TEM and (b) SEM images of the  $\text{Cu}_7\text{S}_4$  nanodisk arrays.

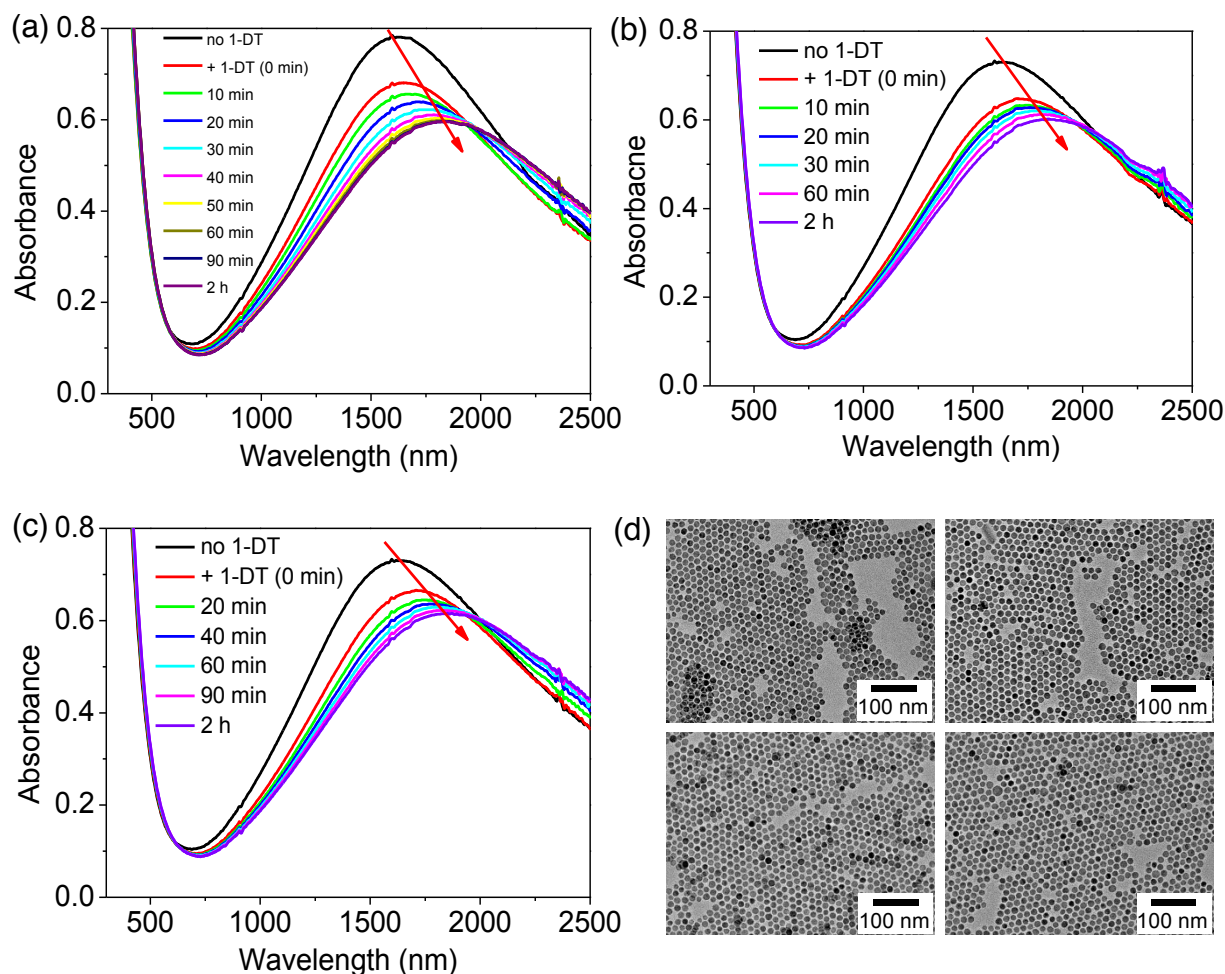

**Figure S5.** Time evolution of UV-Vis-NIR absorption spectra of oxidized  $\text{Cu}_7\text{S}_4$  nanodisks in  $\text{CHCl}_3$  (5 mL) after an addition of (a) 100  $\mu\text{L}$  of 0.1 M 1-DT  $\text{CHCl}_3$  solution (including 10  $\mu\text{mol}$  1-DT), (b) 100  $\mu\text{L}$  of 1.0 M 1-DT  $\text{CHCl}_3$  solution (including 100  $\mu\text{mol}$  1-DT), and (c) 1-DT (80  $\mu\text{mol}$ ) and shaken for 30 min. All the experiments were conducted in a glovebox. (d) TEM images of  $\text{Cu}_7\text{S}_4$  nanodisks (top left) oxidized by air, (top right), reduced by 10  $\mu\text{mol}$  1-DT, (bottom left) 100  $\mu\text{mol}$  1-DT, and 80  $\mu\text{mol}$  of pure 1-DT (bottom right). For TEM observation, samples after 2 h reduction by 1-DT were dried in glovebox. The shape and size of the  $\text{Cu}_7\text{S}_4$  nanodisks are preserved after reduction. The increase of 1-DT concentration does not trigger the formation of nanodisk arrays.

## Calculation of amount of 1-DT required to completely cover the hexagonal {100} facets of nanodisks

We roughly calculated the amount of 1-DT required to completely cover the hexagonal facets of  $\text{Cu}_7\text{S}_4$  nanodisks as follows. First, we calculated the surface area of a hexagonal {100} facet ( $S_{\text{disk}}$ ) of the  $\text{Cu}_7\text{S}_4$  nanodisk to be  $127 \text{ nm}^2$  as a regular hexagon. A volume of a single nanodisk ( $V_{\text{disk}} = 573 \text{ nm}^3$ ) was obtained as the  $S_{\text{disk}}$  value and its thickness. According to the previous work, the crystal structure of roxbyite  $\text{Cu}_{58}\text{S}_{32}$  is triclinic (see details in Figure S6).<sup>1</sup> Because the structure of a unit cell is similar to the cuboid, the volume of a unit cell ( $V_{\text{unit cell}}$ ) can be calculated to be  $2.79 \text{ nm}^3$  by the following formula,

$$V_{\text{unit cell}} = a \times b \times c$$

The number of Cu atoms in a single nanodisk ( $N_{\text{Cu, disk}}$ ) is calculated to be  $2.38 \times 10^4$  according to the following formula,

$$N_{\text{Cu, disk}} = (V_{\text{disk}} / V_{\text{unit cell}}) \times N_{\text{Cu, unit cell}}$$

where  $N_{\text{Cu, unit cell}}$  is the number of Cu atoms in a unit cell ( $58 \times 2 = 116$ ). The concentration of Cu atoms in the whole  $\text{Cu}_7\text{S}_4$  nanodisks in Figure 5c was estimated to be  $24.5 \text{ mM}$  from the O.D. Thus, the number of  $\text{Cu}_7\text{S}_4$  nanodisks ( $N_{\text{disk}}$ ) in  $5.0 \text{ mL}$  of  $\text{CHCl}_3$  solution is calculated to be  $3.1 \times 10^{15}$  by the following equation,

$$N_{\text{disk}} = (5.0 \times 10^{-3} \times 24.5 \times 10^{-3} \times N_A) / N_{\text{Cu, disk}}$$

Where  $N_A$  is the Avogadro's constant. The total surface area of the hexagonal facets of  $\text{Cu}_7\text{S}_4$  nanodisks ( $S$ ) was estimated to be  $7.9 \times 10^{17} \text{ nm}^2$  from the following equation,

$$S = 2 \times S_{\text{disk}} \times N_{\text{disk}}$$

Figure S6 shows that ten Cu atoms are exposed on the (100) facet with the area of 2.08 nm<sup>2</sup> in a unit cell of roxbyite. When we assume that one 1-DT molecule is adsorbed to a single Cu atom on {100} planes, the maximum amount of 1-DT adsorbed on the hexagonal facets is roughly estimated to be 6.3 μmol.

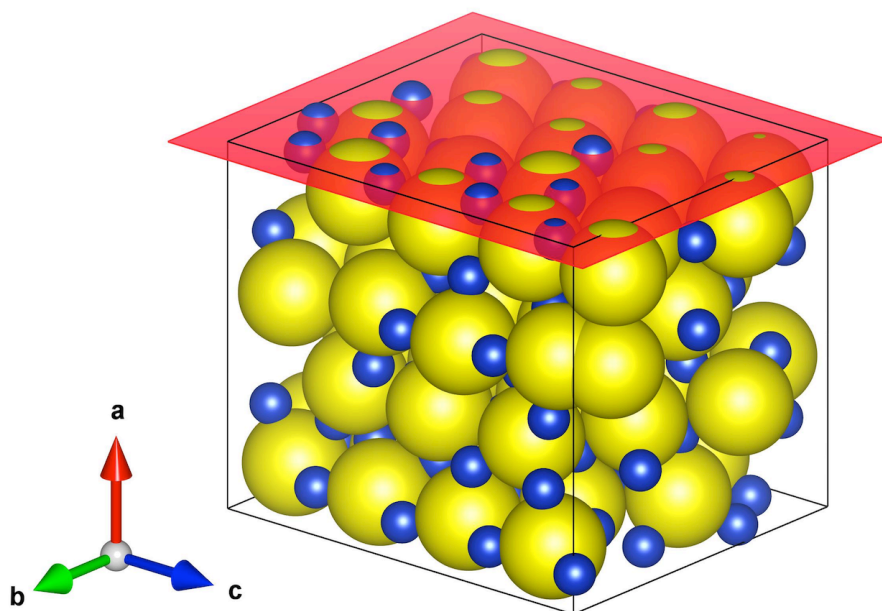

**Figure S6.** Unit cell of triclinic roxbyite Cu<sub>58</sub>S<sub>32</sub> as ideal formula. Cu cations and S anions are shown in small blue spheres and large yellow spheres, respectively. The detailed crystal structure is as follows:  $a = 13.4051(9)$ ,  $b = 13.4090(8)$ ,  $c = 15.4852(3)$  Å;  $\alpha = 90.022(2)$ ,  $\beta = 90.021(2)$ ,  $\gamma = 90.020(3)^\circ$ ;  $Z = 2$ .<sup>1</sup> The translucent red plane represents the (100) plane.



## References

- 1 W. G. Mumme, R. W. Gable and V. Petříček, *Can. Mineral.* 2012, **50**, 423–430.
- 2 M. Kanehara, H. Arakawa, T. Honda, M. Saruyama and T. Teranishi, *Chem. Eur. J.* 2012, **18**, 9230–9238.
